# Supplementary material for: Fast switching organosiloxane ferroelectric liquid crystals
Source: Royal Society of Chemistry journal article supplement (doi:10.1039/b810209k), 2008-01-01
Supplement: b810209k.pdf [file b810209k.pdf]

## Electronic Supplementary Information for:

### Fast switching organosiloxane ferroelectric liquid crystals

Jeffrey C. Roberts,<sup>a</sup> Nadia Kapernaum,<sup>b</sup> Frank Giesselmann,<sup>b</sup> Michael D. Wand<sup>c</sup>  
and Robert P. Lemieux\*<sup>a</sup>

<sup>a</sup> Chemistry Department, Queen's University, Kingston, Ontario, Canada

<sup>b</sup> Institute of Physical Chemistry, Universität Stuttgart, Pfaffenwaldring 55, D-70569 Stuttgart, Germany

<sup>c</sup> LC Vision, LLC, 4150 Darley Avenue, Suite 10, Boulder, Colorado, USA

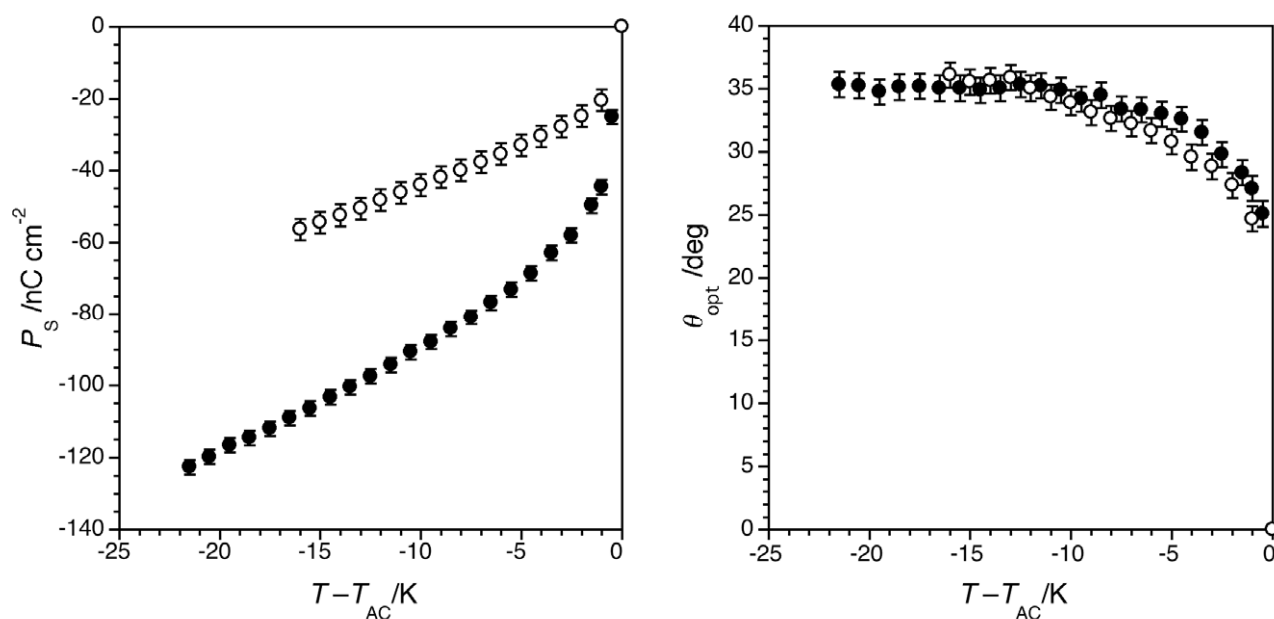

**Fig. 1.** Spontaneous polarization  $P_S$  vs. reduced temperature  $T - T_{AC}$  for compounds **2a** (filled circles) and **2b** (open circles), and optical tilt angle  $\theta_{opt}$  vs. reduced temperature  $T - T_{AC}$  for compounds **2a** (filled circles) and **2b** (open circles).
